# Supplementary material
Source: PubMed Central journal article supplement (PMC6436941)
Supplement: NIHMS1008148-supplement-Appendix.pdf [file NIHMS1008148-supplement-Appendix.pdf]

APPENDIX

Supplemental EXHIBIT 1

CAPTION: Descriptive statistics for Latino adults in California by citizenship and nativity status

| Variables                          | US-born citizen |       |      | Foreign-born: US citizen |       |      | Foreign-born: LPR |       |      | Undocumented |       |      |
|------------------------------------|-----------------|-------|------|--------------------------|-------|------|-------------------|-------|------|--------------|-------|------|
|                                    | Pre             | Post  | p-v  | Pre                      | Post  | p-v  | Pre               | Post  | p-v  | Pre          | Post  | p-v  |
| <b>Latino Heritage</b>             |                 |       |      |                          |       |      |                   |       |      |              |       |      |
| Mexican                            | 76.57           | 76.3  |      | 74.59                    | 73.47 |      | 80.55             | 80.51 |      | 82.23        | 78.94 | *    |
| Other Latino                       | 23.43           | 23.7  |      | 25.41                    | 26.53 |      | 19.45             | 19.49 |      | 17.77        | 21.06 |      |
| <b>Health care outcomes</b>        |                 |       |      |                          |       |      |                   |       |      |              |       |      |
| Had at least one MD visit          | 77.76           | 77.09 |      | 79.11                    | 78.87 |      | 72.23             | 72.68 |      | 59.34        | 60.05 |      |
| Had at least one ED visit          | 21.63           | 24.55 | **   | 16.23                    | 19.3  | *    | 14.67             | 16.2  |      | 12.91        | 15.84 | *    |
| Usual source of care               | 74.62           | 76.39 |      | 78.47                    | 82.78 | *    | 67.02             | 72.91 | **   | 54.35        | 59.79 | **   |
| <b>Health Insurance</b>            |                 |       |      |                          |       |      |                   |       |      |              |       |      |
| Uninsured                          | 21.73           | 13.82 | **** | 24.97                    | 13.78 | **** | 38.47             | 21.03 | **** | 55.92        | 48.02 | ***  |
| Public                             | 20.45           | 35.23 | **** | 16.83                    | 33.44 | **** | 23.53             | 44.19 | **** | 28.18        | 38.67 | **** |
| Private                            | 57.82           | 50.94 | **** | 58.2                     | 52.78 | **   | 38                | 34.79 |      | 15.9         | 13.24 |      |
| <b>Explanatory variables</b>       |                 |       |      |                          |       |      |                   |       |      |              |       |      |
| Female                             | 49.2            | 49.1  |      | 49.8                     | 55.52 | **   | 48.87             | 49.59 |      | 48.69        | 47.30 |      |
| Married                            | 35.46           | 29.7  | ***  | 68.94                    | 65.36 |      | 63.39             | 58.36 | *    | 45.33        | 44.78 |      |
| Age in years                       |                 |       | ***  |                          |       | **** |                   |       | **** |              |       | **** |
| 18-29                              | 49.8            | 53.57 |      | 12.45                    | 8.42  |      | 15.89             | 13.14 |      | 29.14        | 14.48 |      |
| 30-39                              | 19.67           | 20    |      | 21                       | 15.6  |      | 28.75             | 20.43 |      | 42.15        | 42.47 |      |
| 40-49                              | 15.56           | 12.31 |      | 32.75                    | 29.65 |      | 32.14             | 33.5  |      | 21.84        | 30.60 |      |
| 50-64                              | 14.98           | 14.12 |      | 33.8                     | 46.33 |      | 23.21             | 32.93 |      | 6.87         | 12.44 |      |
| <b>Education</b>                   |                 |       |      |                          |       |      |                   |       |      |              |       |      |
| Less than high school              | 10.95           | 8.67  |      | 38.52                    | 40.75 |      | 58.62             | 61.59 |      | 64.11        | 64.15 |      |
| High school graduate               | 37.41           | 33.98 |      | 28.71                    | 23.99 |      | 21.58             | 20.47 |      | 24.15        | 23.52 |      |
| College and more                   | 51.64           | 57.34 |      | 32.77                    | 35.26 |      | 19.8              | 17.94 |      | 11.74        | 12.33 |      |
| <b>English use and proficiency</b> |                 |       |      |                          |       |      |                   |       |      |              |       |      |
| Speak very well/well               | 98.44           | 98.12 |      | 60.45                    | 58.3  |      | 33.13             | 31.83 |      | 16.06        | 18.52 |      |
| Speak not well/not at all          | 1.56            | 1.88  |      | 39.55                    | 41.7  |      | 66.87             | 68.17 |      | 83.94        | 81.48 |      |
| <b>Poverty level</b>               |                 |       |      |                          |       |      |                   |       |      |              |       |      |
| 0-138%                             | 25.14           | 30.76 |      | 32.47                    | 36.12 |      | 53.68             | 52.04 |      | 74.21        | 72.35 |      |
| 139-250%                           | 21.15           | 22.08 |      | 28.17                    | 26.88 |      | 28.39             | 29.32 |      | 18.18        | 19.73 |      |
| 251-400%                           | 20.73           | 19.32 |      | 19.36                    | 19.35 |      | 9.82              | 12.61 |      | 5.13         | 5.65  |      |
| >400%                              | 32.99           | 27.84 |      | 20                       | 17.65 |      | 8.1               | 6.04  |      | 2.47         | 2.27  |      |

|                             |       |       |       |       |       |       |       |       |       |       |
|-----------------------------|-------|-------|-------|-------|-------|-------|-------|-------|-------|-------|
| Employment                  |       |       |       |       |       |       |       |       |       |       |
| Employed                    | 70.88 | 73.84 | 73.29 | 73.4  | 70.28 | 73.57 |       | 67.9  | 69.25 |       |
| Not employed                | 29.12 | 26.16 | 26.71 | 26.6  | 29.72 | 26.43 |       | 32.1  | 30.75 |       |
| Self-reported health status |       |       |       |       |       |       |       |       |       |       |
| Excellent                   | 18.67 | 16.57 | 15.36 | 15.8  | 11.44 | 10.51 |       | 9.8   | 11.51 |       |
| Very good                   | 32.12 | 32.22 | 22.37 | 18.72 | 14.05 | 13.28 |       | 12.68 | 13.77 |       |
| Good                        | 31.92 | 33.07 | 33.56 | 34.44 | 37.29 | 39.54 |       | 43.99 | 36.94 |       |
| Fair                        | 13.69 | 14.22 | 23.93 | 26.41 | 32.52 | 31.2  |       | 30.82 | 34.58 |       |
| Poor                        | 3.59  | 3.91  | 4.78  | 4.63  | 4.7   | 5.46  |       | 2.7   | 3.21  |       |
| Chronic conditions          |       |       |       |       |       |       |       |       |       |       |
| Diabetes                    | 6.04  | 5.42  | 10.69 | 14.9  | **    | 12.57 | 12.77 | 6.33  | 8.12  |       |
| High Blood Pressure         | 18.35 | 16.62 | 23.82 | 28.16 | **    | 20.31 | 28.2  | ***   | 14.88 | 19.31 |
| Heart Disease               | 2.41  | 1.83  | 3.53  | 4.41  |       | 4.05  | 4.64  |       | 2.72  | 3.14  |
| Asthma                      | 15.98 | 18.66 | **    | 7.18  | 8.76  | 5.51  | 7.04  |       | 4.44  | 6.41  |
| Residence                   |       |       | **    |       |       |       |       |       |       | *     |
| Urban                       | 75.3  | 79.46 | 81.89 | 81.23 |       | 78.74 | 79.72 |       | 82.59 | 87.07 |
| Suburban                    | 15.99 | 13.41 | 11.69 | 11.49 |       | 10.57 | 9.67  |       | 8.94  | 6.72  |
| Rural                       | 8.71  | 7.13  | 6.42  | 7.28  |       | 10.68 | 10.61 |       | 8.47  | 6.21  |
| California Region           |       |       |       |       |       |       |       | *     |       |       |
| Northern California         | 1.58  | 1.88  | 0.99  | 1.18  |       | 1.26  | 1.45  |       | 1.61  | 1.03  |
| Central Valley              | 17.62 | 17.16 | 17.78 | 17.92 |       | 18.15 | 19.96 |       | 21.25 | 22.39 |
| Central Coast               | 18.18 | 16.99 | 11.28 | 12.67 |       | 16.33 | 19.48 |       | 13.53 | 15.12 |
| Southern California         | 62.62 | 63.97 | 69.95 | 68.22 |       | 64.26 | 59.11 |       | 63.61 | 61.46 |
| Years in the U.S.           |       |       |       |       |       |       |       |       |       |       |
| 0-4                         | N/A   | N/A   | 0.59  | 0.17  | ****  | 5.29  | 6.94  | ****  | 14.01 | 7.02  |
| 5-9                         | N/A   | N/A   | 2.82  | 1.55  |       | 9.11  | 7.34  |       | 25.59 | 12.95 |
| 10-14                       | N/A   | N/A   | 6.63  | 4.96  |       | 12.01 | 12.26 |       | 28.33 | 27.28 |
| 15 and above                | N/A   | N/A   | 89.96 | 93.32 |       | 73.6  | 73.47 |       | 32.07 | 52.75 |

SOURCE: California Health Interview Survey (CHIS) 2007-2016

Notes: N/A, not applicable. LPR: Legal Permanent Resident (e.g. "green card" holder) MD visit: Physician visit, ED visit: Emergency Department visit  
Pre-ACA 2007-2013, Post-ACA 2014-2016

t-tests for continuous variables, chi-squared tests for categorical variables

p-v (p-values): \*p<0.10, \*\*p<0.05, \*\*\*p<0.01, \*\*\*\*p<0.001

Supplemental EXHIBIT 3

CAPTION: Multivariable logistic regression analysis: health insurance coverage, health care access and utilization in California (2007-2016)

| Variables                            | Logistic estimation (Odds Ratios) |      |             |      |             |      |             |      |
|--------------------------------------|-----------------------------------|------|-------------|------|-------------|------|-------------|------|
|                                      | Health Insurance                  | p-v  | MD visits   | p-v  | ED visits   | p-v  | USC         | p-v  |
| <b>Health Insurance Coverage</b>     |                                   |      |             |      |             |      |             |      |
| Pre-ACA 2007-2013 (ref)              | ref                               |      | ref         |      | ref         |      | ref         |      |
| Post-ACA 2014-2016                   | 1.83                              | **** | 0.86        | **   | 1.06        |      | 1.08        |      |
|                                      | [1.6-2.0]                         |      | [0.77-0.96] |      | [0.94-1.13] |      | [0.95-1.22] |      |
| <b>Latino Heritage</b>               |                                   |      |             |      |             |      |             |      |
| US-Born citizen (ref)                | ref                               |      | ref         |      | ref         |      | ref         |      |
| <b>Mexican Latinos: Foreign-born</b> |                                   |      |             |      |             |      |             |      |
| Documented                           | 0.67                              | **   | 1.04        |      | 0.91        |      | 0.61        | ***  |
|                                      | [0.49-0.91]                       |      | [0.75-1.44] |      | [0.94-1.18] |      | [0.45-0.82] |      |
| Undocumented                         | 0.28                              | **** | 0.91        |      | 0.89        |      | 0.58        | **** |
|                                      | [0.20-0.37]                       |      | [0.67-1.23] |      | [0.58-1.39] |      | [0.42-0.78] |      |
| <b>Other Latinos: Foreign-born</b>   |                                   |      |             |      |             |      |             |      |
| Documented                           | 0.61                              | ***  | 1.27        |      | 1.23        |      | 0.67        | **   |
|                                      | [0.44-0.83]                       |      | [0.88-1.81] |      | [0.77-1.97] |      | [0.48-0.92] |      |
| Undocumented                         | 0.28                              | **** | 1.03        |      | 1.08        |      | 0.58        | **   |
|                                      | [0.19-0.39]                       |      | [0.58-1.19] |      | [0.69-1.69] |      | [0.38-0.88] |      |
| <b>Health insurance</b>              |                                   |      |             |      |             |      |             |      |
| Private                              | NA                                |      | ref         |      | ref         |      | ref         |      |
| Public                               | NA                                |      | 0.89        |      | 1.59        | **** | 0.67        | **** |
|                                      |                                   |      | [0.77-1.05] |      | [1.33-1.90] |      | [0.58-0.77] |      |
| Uninsured                            | NA                                |      | 0.25        |      | 0.74        | ***  | 0.27        | **** |
|                                      |                                   |      | [0.31-0.40] |      | [0.61-0.91] |      | [0.24-0.30] |      |
| Female                               | 1.68                              | **** | 2.47        | **** | 1.14        | *    | 2.12        | **** |
|                                      | [1.5-1.87]                        |      | [2.22-2.74] |      | [0.98-1.31] |      | [1.93-2.33] |      |
| Married                              | 1.53                              | **** | 1.11        | **   | 0.88        | *    | 1.40        | **** |
|                                      | [1.37-1.71]                       |      | [1.00-1.22] |      | [0.76-1.02] |      | [1.23-1.58] |      |
| <b>Age in years</b>                  |                                   |      |             |      |             |      |             |      |
| 18-29 (ref)                          | ref                               |      | ref         |      | ref         |      | ref         |      |
| 30-39                                | 1.39                              | ***  | 0.90        |      | 1.03        |      | 1.29        | **** |
|                                      | [1.15-1.66]                       |      | [0.78-1.04] |      | [0.86-1.22] |      | [1.13-1.45] |      |
| 40-49                                | 1.35                              | ***  | 0.95        |      | 0.91        |      | 1.63        | **** |
|                                      | [1.1-1.64]                        |      | [0.79-1.13] |      | [0.76-1.07] |      | [1.38-1.93] |      |
| >=50                                 | 1.25                              | **   | 1.16        |      | 0.85        |      | 2.00        | **** |
|                                      | [1.01-1.53]                       |      | [0.96-1.40] |      | [0.69-1.03] |      | [1.65-2.42] |      |

|                             |             |      |             |      |             |      |
|-----------------------------|-------------|------|-------------|------|-------------|------|
| Education                   |             |      |             |      |             |      |
| Less than high school (ref) | ref         |      | ref         |      | ref         |      |
| High school graduate        | 1.12        | *    | 0.98        |      | 1.01        |      |
|                             | [0.98-1.27] |      | [0.83-1.15] |      | [0.86-1.19] |      |
| College                     | 1.14        | *    | 1.21        | *    | 1.20        | **   |
|                             | [0.99-1.31] |      | [0.98-1.49] |      | [1.02-1.40] |      |
| English use and proficiency |             |      |             |      |             |      |
| Speak very well/well (ref)  | ref         |      | ref         |      | ref         |      |
| Speak not well/not at all   | 0.64        | **** | 0.84        |      | 0.69        | **** |
|                             | [0.55-0.74] |      | [0.72-0.98] |      | [0.59-0.81] |      |
| Poverty level               |             |      |             |      |             |      |
| 0-138%                      | ref         |      | ref         |      | ref         |      |
| 139-250%                    | 0.92        |      | 1.14        | *    | 0.94        |      |
|                             | [0.78-1.09] |      | [0.98-1.32] |      | [0.81-1.09] |      |
| 251-400%                    | 1.49        | **** | 1.20        | *    | 0.95        | **   |
|                             | [1.21-1.82] |      | [0.98-1.45] |      | [0.77-1.15] |      |
| >400%                       | 2.66        | **** | 1.46        | **** | 0.99        | **** |
|                             | [2.08-3.39] |      | [1.23-1.73] |      | [0.79-1.25] |      |
| Employment                  |             |      |             |      |             |      |
| Employed (ref)              | ref         |      | ref         |      | ref         |      |
| Not employed                | 0.98        |      | 1.06        |      | 1.02        |      |
|                             | [0.87-1.10] |      | [0.93-1.20] |      | [0.89-1.16] |      |
| Self-reported health status |             |      |             |      |             |      |
| Excellent (ref)             | ref         |      | ref         |      | ref         |      |
| Very good                   | 0.98        |      | 1.18        | *    | 1.27        | **   |
|                             | [0.81-1.16] |      | [0.98-1.42] |      | [1.02-1.57] |      |
| Good                        | 0.93        |      | 1.18        | **   | 1.42        | **** |
|                             | [0.77-1.11] |      | [1.01-1.38] |      | [1.19-1.69] |      |
| Fair                        | 0.77        | ***  | 1.47        | **** | 2.13        | **** |
|                             | [0.63-0.92] |      | [1.20-1.79] |      | [1.75-2.59] |      |
| Poor                        | 0.86        |      | 1.85        | ***  | 4.38        | **** |
|                             | [0.65-1.13] |      | [1.32-2.60] |      | [3.34-5.72] |      |
| Chronic conditions          |             |      |             |      |             |      |
| Diabetes                    | 1.61        | **** | 2.82        | **** | 1.09        | *    |
|                             | [1.29-2.0]  |      | [1.99-3.97] |      | [0.89-1.31] |      |
| High Blood Pressure         | 1.19        | **   | 1.57        | **** | 1.30        | ***  |
|                             | [1.0-1.6]   |      | [1.33-1.87] |      | [1.12-1.49] |      |
| Heart Disease               | 1.20        |      | 1.77        | ***  | 2.37        | **** |
|                             | [0.90-1.65] |      | [1.26-2.49] |      | [1.82-3.07] |      |
| Asthma                      | 1.39        | **** | 1.42        | **** | 1.51        | **** |
|                             | [1.18-1.65] |      | [1.18-1.71] |      | [1.29-1.77] |      |

|                                  |             |             |             |             |      |
|----------------------------------|-------------|-------------|-------------|-------------|------|
| Residence                        |             |             |             |             |      |
| Urban (ref)                      | ref         | ref         | ref         | ref         |      |
| Suburban                         | 0.93        | 0.94        | 1.16        | 0.97        |      |
|                                  | [0.79-1.09] | [0.80-1.11] | [0.96-1.38] | [0.83-1.15] |      |
| Rural                            | 0.89        | 0.96        | 0.97        | 0.99        |      |
|                                  | [0.75-1.04] | [0.80-1.16] | [0.79-1.18] | [0.85-1.16] |      |
| California Region                |             |             |             |             |      |
| Northern California (re)         | ref         | ref         | ref         | ref         |      |
| Central Valley                   | 1.09        | 0.83        | 0.72        | 0.96        | ***  |
|                                  | [0.98-1.55] | [0.64-1.12] | [0.56-0.91] | [0.72-1.22] |      |
| Central Coast                    | 1.24        | 0.85        | 0.88        | 0.97        | *    |
|                                  | [0.84-1.39] | [0.64-1.06] | [0.69-1.13] | [0.73-1.29] |      |
| Southern California              | 0.9         | 0.96        | 1.00        | 0.92        |      |
|                                  | [0.72-1.11] | [0.76-1.22] | [0.79-1.25] | [0.69-1.20] |      |
| Years in the U.S. (Foreign-born) |             |             |             |             |      |
| 0-4 (ref)                        | ref         | ref         | ref         | ref         |      |
| 5-9                              | 1.08        | 0.79        | 0.91        | 1.80        | **** |
|                                  | [0.77-1.52] | [0.57-1.08] | [0.58-1.42] | [1.30-2.49] |      |
| 10-14                            | 1.30        | 0.92        | 0.80        | 1.97        | **** |
|                                  | [0.97-1.72] | [0.68-1.24] | [0.52-1.23] | [1.42-2.75] |      |
| 15 and above                     | 1.26        | 0.94        | 0.81        | 1.73        | ***  |
|                                  | [0.93-1.68] | [0.68-1.29] | [0.54-1.22] | [1.27-2.35] |      |

SOURCE: California Health Interview Survey (CHIS) 2007-2016

Notes: MD visit: Physician visit, ED visit: Emergency Department visit USC: Usual Source of Care

Documented: Foreign-born U.S. citizen and LPR (e.g. "green card" holder)

95% Confidence Intervals in brackets

p-v (p-values): \*p<0.10, \*\*p<0.05, \*\*\*p<0.01, \*\*\*\*p<0.001

Supplemental EXHIBIT 4

CAPTION: Decomposition analysis: parsing out disparities between Mexican and other Latinos in California (2007-2016)

| Variables                           | Health Insurance       |       |      | MD visits                |        |      | ED visits              |        |      | USC                     |       |      |
|-------------------------------------|------------------------|-------|------|--------------------------|--------|------|------------------------|--------|------|-------------------------|-------|------|
| Predicted probability               |                        |       |      |                          |        |      |                        |        |      |                         |       |      |
| Mexican Latinos                     | 0.72                   |       |      | 0.73                     |        |      | 0.18                   |        |      | 0.71                    |       |      |
| Other Latinos                       | 0.87                   |       |      | 0.80                     |        |      | 0.20                   |        |      | 0.82                    |       |      |
| Difference in predicted probability |                        |       |      |                          |        |      |                        |        |      |                         |       |      |
| Total difference                    | -0.15                  |       |      | -0.08                    |        |      | -0.02                  |        |      | -0.11                   |       |      |
| Observed differences                | 79                     |       |      | 93                       |        |      | 73                     |        |      | 98                      |       |      |
| Unobserved differences              | 21                     |       |      | 7                        |        |      | 27                     |        |      | 2                       |       |      |
|                                     | Coef (SE)              | %     | p-v  | Coef (SE)                | %      | p-v  | Coef (SE)              | %      | p-v  | Coef (SE)               | %     | p-v  |
| Explanatory variables               |                        |       |      |                          |        |      |                        |        |      |                         |       |      |
| Health Insurance Coverage           |                        |       |      |                          |        |      |                        |        |      |                         |       |      |
| Pre-ACA 2007-2013 (ref)             | ref                    | ref   |      | ref                      | ref    |      | ref                    | ref    |      | ref                     | ref   |      |
| Post-ACA 2014-2016                  | .0086347<br>(.000648)  | -5.76 | **** | .0000128<br>(.0000373)   | -0.02% |      | -.000185<br>(.000188)  | 0.93%  |      | .000341<br>(.0000235)   | -0.31 | **** |
| Legal Status                        |                        |       |      |                          |        |      |                        |        |      |                         |       |      |
| Documented (ref)                    | Ref                    | ref   |      | ref                      | ref    |      | ref                    | ref    |      | ref                     | ref   |      |
| Undocumented                        | -.0362504<br>(.002468) | 24.17 | **** | -.00512832<br>(.0005026) | 6.41   | **** | -.0004585<br>(.000763) | 2.29%  |      | -.0006961<br>(.0013075) | 0.63% |      |
| Health insurance                    |                        |       |      |                          |        |      |                        |        |      |                         |       |      |
| Private (ref)                       | -                      | -     |      | ref                      | ref    |      | ref                    | ref    |      | ref                     | ref   |      |
| Public                              | -                      | -     |      | -.0028086<br>(.0019267)  | 3.51%  |      | .0061194<br>(.000954)  | -30.60 | **** | -.0067576<br>(.0002102) | 6.12  | **** |
| Uninsured                           | -                      | -     |      | -.0290838<br>(.000911)   | 36.35  | **** | -.0056517<br>(.001856) | 28.26  | ***  | -.0352665<br>(.0012616) | 31.92 | **** |
| Female                              | .0025788<br>(.000556)  | -1.72 | **** | .0041996<br>(.0007456)   | -5.25  | **** | -.0056517<br>(.001856) | 3.07   | **** | .0037864<br>(.0007459)  | -3.43 | **** |
| Married                             | .0010029<br>(.000380)  | -0.67 | ***  | -.0001009<br>(.0001646)  | 0.13   |      | .0004035<br>(.000036)  | -2.02  | **** | -.0006847<br>(.0000576) | 0.62  | **** |
| Age in years                        |                        |       |      |                          |        |      |                        |        |      |                         |       |      |
| 18-29 (ref)                         | ref                    | ref   |      | ref                      | ref    |      | ref                    | ref    |      | ref                     | ref   |      |
| 30-39                               | .0037658<br>(.000509)  | 1.29  | **** | -.0007626<br>(.0004188)  | 0.95   |      | .0000515<br>(.000148)  | -0.26  |      | .0032168<br>(.0006994)  | -2.91 | **** |
| 40-49                               | .0011455<br>(.000312)  | -0.76 | **** | -.0001908<br>(.0001641)  | 0.24   |      | -.0000914<br>(.000065) | 0.46   |      | .0014178<br>(.0002569)  | -1.28 | **** |
| >=50                                | -.0033204<br>(.001955) | 2.21  | *    | -.0029932<br>(.0003199)  | 3.74   | **** | .0017987<br>(.001667)  | -8.99  |      | -.012874<br>(.0004475)  | 11.65 | **** |

|                             |                        |       |      |                         |        |      |                         |        |                      |                         |       |      |
|-----------------------------|------------------------|-------|------|-------------------------|--------|------|-------------------------|--------|----------------------|-------------------------|-------|------|
| Education                   |                        |       |      |                         |        |      |                         |        |                      |                         |       |      |
| Less than high school (ref) | ref                    | ref   | ref  | ref                     | ref    | ref  | ref                     | ref    | ref                  |                         |       |      |
| High school graduate        | .0012884<br>(.001406)  | -0.85 |      | -.000179<br>(.0005405)  | 0.22   |      | -.0000854<br>(.000626)  | 0.43   | .001859<br>(.000482) | -1.68                   | ****  |      |
| College                     | -.0082506<br>(.006725) | 5.50  |      | -.0102919<br>(.004983)  | 12.86  | **   | -.0073412<br>(.002026)  | 36.70  | ****                 | -.0193551<br>(.0035628) | 17.52 | **** |
| English use and proficiency |                        |       |      |                         |        |      |                         |        |                      |                         |       |      |
| Speak very well/well (ref)  | ref                    | ref   | ref  | ref                     | ref    | ref  | ref                     | ref    | ref                  | ref                     |       |      |
| Speak not well/not at all   | -.0330349<br>(.001889) | 22.03 | **** | -.0091979<br>(.0063985) | 11.50% |      | -.0023551<br>(.000900)  | 11.76  | ****                 | -.0229911<br>(.0027145) | 20.81 | **** |
| Poverty level               |                        |       |      |                         |        |      |                         |        |                      |                         |       |      |
| 0-138% (ref)                | ref                    | ref   | ref  | ref                     | ref    | ref  | ref                     | ref    | ref                  | ref                     |       |      |
| 139-250%                    | -.0006663<br>(.001559) | 0.44  |      | .0015672<br>(.0002504)  | -2.00  | **** | -.0007744<br>(.000713)  | 3.87%  |                      | .0024043<br>(.0008924)  | -2.18 | ***  |
| 251-400%                    | -.0022505<br>(.000284) | 1.50  | **** | -.0005603<br>(.0001847) | 0.70   | ***  | .0003838<br>(.000212)   | -1.92% | *                    | -.0008565<br>(.0001323) | 0.78  | **** |
| >400%                       | -.04373<br>(.002708)   | 29.17 | **** | -.0160323<br>(.0016948) | 20.04  | **** | .0021955<br>(.002394)   | 10.98% |                      | -.0181684<br>(.0009504) | 16.44 | **** |
| Employment                  |                        |       |      |                         |        |      |                         |        |                      |                         |       |      |
| Employed (ref)              | ref                    | ref   | ref  | ref                     | ref    | ref  | ref                     | ref    | ref                  | ref                     |       |      |
| Not employed                | -.0000118<br>(.000108) | 0.00  |      | .0002018<br>(.0000331)  | -0.25  | **** | .000109<br>(.000043)    | -0.55  | ***                  | -.0001277<br>(.0003756) | 0.12  |      |
| Self-reported health status |                        |       |      |                         |        |      |                         |        |                      |                         |       |      |
| Excellent (ref)             | ref                    | ref   | ref  | ref                     | ref    | ref  | ref                     | ref    | ref                  | ref                     |       |      |
| Very good                   | -.0004743<br>(.001031) | 0.32  |      | -.0024971<br>(.0006868) | 3.12   | **** | -.0047547<br>(.004348)  | 23.77  | *                    | -.0024228<br>(.0012114) | 2.20  | **   |
| Good                        | -.0003813<br>(.001114) | 0.25  |      | .0018812<br>(.0003469)  | -2.35  | **** | .0024001<br>(.001355)   | -12.00 |                      | .001443<br>(.0009194)   | -1.31 |      |
| Fair                        | -.0028269<br>(.001238) | 1.89  | ***  | .0045235<br>(.0004399)  | -5.65  | **** | .0165015<br>(.005748)   | -82.50 | ****                 | .0022667<br>(.0009043)  | -2.05 | ***  |
| Poor                        | .0000743<br>(.000058)  | -0.04 |      | -.0007543<br>(.0000853) | 0.94   | **** | .0029247<br>(.000453)   | -14.62 | ****                 | -.0002157<br>(.0000658) | 0.20  | **** |
| Chronic conditions          |                        |       |      |                         |        |      |                         |        |                      |                         |       |      |
| Diabetes                    | .0008784<br>(.000050)  | -0.59 | **** | .0009342<br>(.0000491)  | -1.17  | **** | .0005879<br>(.000366)   | -2.94  |                      | .0000863<br>(.0000524)  | -0.08 |      |
| High Blood Pressure         | -.0008084<br>(.000136) | 0.54  | **** | -.0030629<br>(.0000973) | 3.83   | **** | -.0005935<br>(.0002346) | 2.97   | ***                  | -.0031506<br>(.0000938) | 2.85  | **** |
| Heart Disease               | -.0001936<br>(.000295) | 0.13  |      | -.0006065<br>(.0002318) | 0.76   | ***  | -.0010492<br>(.000089)  | 5.25   | ****                 | -.0000716<br>(.0003088) | 0.07  |      |
| Asthma                      | -.0025999<br>(.000571) | 1.73  | **** | -.0031546<br>(.0006164) | 3.94   | **** | -.0028598<br>(.000033)  | 14.30  | ****                 | -.0001173<br>(.0009395) | 0.11  |      |

|                           |                        |       |      |                         |       |      |                        |        |      |                         |       |      |
|---------------------------|------------------------|-------|------|-------------------------|-------|------|------------------------|--------|------|-------------------------|-------|------|
| Residence                 |                        |       |      |                         |       |      |                        |        |      |                         |       |      |
| Urban (ref)               | ref                    | ref   |      | ref                     | ref   |      | ref                    | ref    | ref  | ref                     |       |      |
| Suburban                  | .0005156<br>(.001151)  | -0.34 |      | .0004519<br>(.000406)   | -0.56 |      | -.0015776<br>(.000398) | 7.88   | **** | -.0001065<br>(.0006637) | 0.10  |      |
| Rural                     | .000197<br>(.000104)   | -0.13 | **   | -.0000081<br>(.0000429) | 0.01  |      | .0001322<br>(.000105)  | -0.66  |      | -.0000654<br>(.0001086) | 0.06  |      |
| California Region         |                        |       |      |                         |       |      |                        |        |      |                         |       |      |
| Northern California (ref) | ref                    | ref   |      | ref                     | ref   |      | ref                    | ref    |      | ref                     | ref   |      |
| Central Coast             | -.0027212<br>(-.00272) | 1.81  | **** | .0039172<br>(.0005996)  | -4.90 | **** | .002787<br>(.000165)   | -13.94 | **** | .0016761<br>(.0007288)  | -1.52 | ***  |
| Central Valley            | .000187<br>(.000068)   | -0.12 | **** | -.0012923<br>(.0000363) | 1.62  | **** | -.0006912<br>(.000091) | 3.46   | **** | -.0003593<br>(.0000581) | 0.33  | **** |
| Southern California       | -.0008324<br>(.000404) | 0.56  | **   | -.001663<br>(.0006059)  | 2.08  | ***  | -.0015128<br>(.000161) | 7.56   | **** | -.0025918<br>(.0008716) | 2.36  | **** |

SOURCE: California Health Interview Survey (CHIS) 2007-2016

Notes: MD visit: Physician visit, ED visit: Emergency Department visit USC: Usual Source of Care

Documented: Foreign-born U.S. citizen and LPR (e.g. "green card" holder)

Values expressed as percentage (%). Among individual factors, positive/negative coefficients indicate the share of explanatory variables positively/negatively associated with disparities in outcomes between Mexican and other Latinos.

Standard Errors in parenthesis, p-v (p-values): \*p<0.10, \*\*p<0.05, \*\*\*p<0.01, \*\*\*\*p<0.001
